# Supplementary material for: A fluorimetric test strip with suppressed “Coffee Ring Effect” for selective mercury ion analysis
Source: Royal Society of Chemistry journal article supplement (doi:10.1039/d2an00562j), 2022-01-01
Supplement: d2an00562j1.pdf [file d2an00562j1.pdf]

## Supporting Information

### A Fluorimetric Test Strip with Suppressed “Coffee Ring Effect” for Selective Mercury Ion Analysis

Yuchun Qiao<sup>a, b</sup>, Yu Fang<sup>c</sup>, Jizhen Shang<sup>a</sup>, Xiaoting Zhao<sup>a</sup>, Shuai Li<sup>a</sup>, Guojiang Mao<sup>d</sup>, Hua Wang<sup>a\*</sup>

<sup>a</sup> *Huzhou Key Laboratory of Medical and Environmental Applications Technologies, School of Life Sciences, Huzhou University, Zhejiang, 313000, P.R. China.*

<sup>b</sup> *Beijing Key Laboratory for Bioengineering and Sensing Technology, School of Chemistry and Bioengineering, University of Science and Technology Beijing, Beijing 100083, P.R. China.*

<sup>c</sup> *Department of Chemistry, Capital Normal University, Beijing 100048, P.R. China.*

<sup>d</sup> *Henan Key Laboratory of Organic Functional Molecule and Drug Innovation, School of Chemistry and Chemical Engineering, Henan Normal University, Xinxiang, Henan, 453007, P.R. China.*

\* **Corresponding authors:** Huzhou Key Laboratory of Medical and Environmental Applications Technologies, School of Life Sciences, Huzhou University, Zhejiang, 313000, P.R. China. Email addresses: [Wanghua@zjhu.edu.cn](mailto:Wanghua@zjhu.edu.cn) (H. Wang).

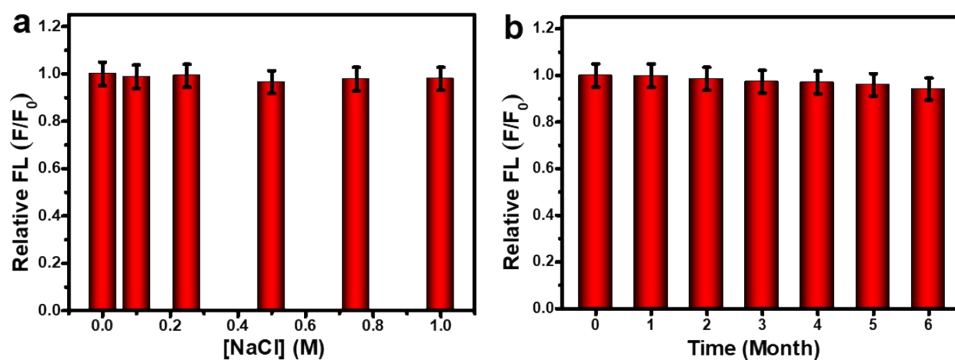

**Figure S1.** Environmental stability investigation on AgNCs stored (a) in the different ionic strengths and (b) in water over the different time intervals at 4 °C.

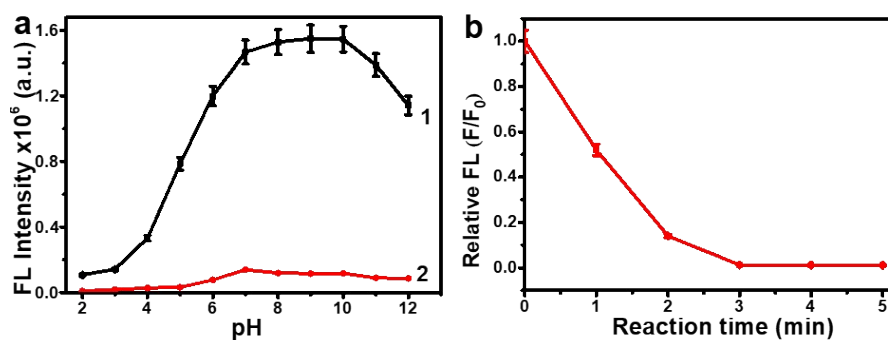

**Figure S2.** (a) Optimization of the fluorimetric sensing conditions of the pH-dependent fluorescence intensities for AgNCs in the (1) absence and (2) presence of  $Hg^{2+}$  ions. (b) Reaction time-dependent relative fluorescence intensities for AgNCs with  $Hg^{2+}$  ions.

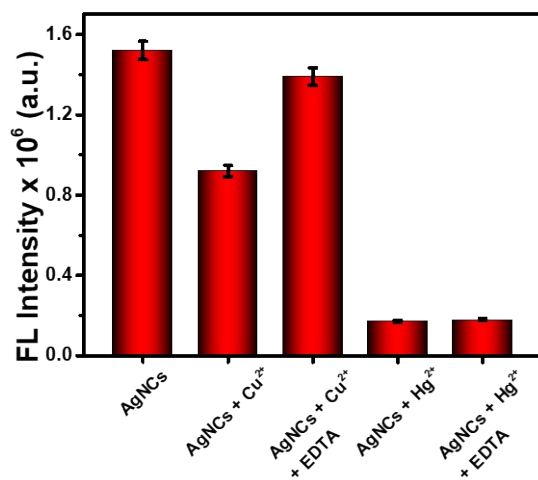

**Figure S3.** Fluorescence intensity of AgNCs in the absence and presence of Cu<sup>2+</sup> ions, Cu<sup>2+</sup> ions with EDTA, Hg<sup>2+</sup> ions, and Hg<sup>2+</sup> ions with EDTA, where 5.0 μM Cu<sup>2+</sup> or Hg<sup>2+</sup> ions and 10 μM EDTA were used.

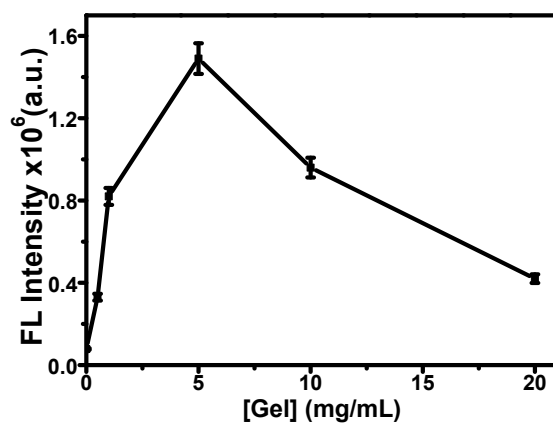

**Figure S4.** Optimization of Gel concentrations for the preparation of Gel/AgNCs test strips.

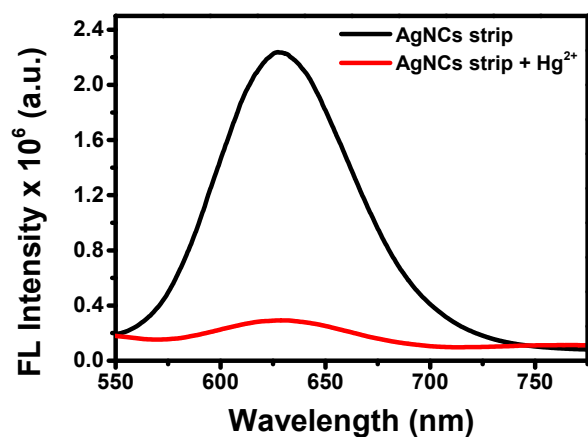

**Figure S5.** The fluorescence intensities of Gel/AgNCs test strips in the absence and presence of  $\text{Hg}^{2+}$  ions.

**Table S1** Comparison of analytical performances among different detection methods for  $\text{Hg}^{2+}$

| Detection methods  | Probe materials                  | Linear range (nM) | LOD (nM) | References |
|--------------------|----------------------------------|-------------------|----------|------------|
| Fluorimetry        | Amino acid-based probe           | 0.0-500           | 9.1      | [1]        |
| Colorimetry        | AuNPs                            | 25-750            | 50       | [2]        |
| Electrochemistry   | MB-DNA/GO                        | 0.5-50            | 0.12     | [3]        |
| Raman spectroscopy | $\text{Fe}_3\text{O}_4@$ Ag-DMcT | 1.0-100000        | 1.0      | [4]        |
| Fluorimetry        | Gel/AgNCs test strips            | 20-312500         | 12       | This work  |

## References

- [1] S. Oh, J. Jeon, J. Jeong, J. Park, E.-T. Oh, H. J. Park and K.-H. Lee, *Anal. Chem.*, 2020,

**92**, 4917-4925.

- [2] G. H. Chen, W. Y. Chen, Y. C. Yen, C. W. Wang, H. T. Chang and C. F. Chen, *Anal. Chem.*, 2014, **86**, 6843-6849.
- [3] M. Lu, R. Xiao, X. Zhang, J. Niu, X. Zhang and Y. Wang, *Biosens. Bioelectron.*, 2016, **85**, 267-271.
- [4] Z.Y. Chen, A. Gupta and S. Chattopadhyay, *Sens. Actuators, B*, 2021, **337**, 129788.
